# Supplementary material for: A behavioral task for the validation of a gaze-contingent simulated scotoma
Source: Springer Nature journal article supplement (doi:10.3758/s13428-013-0321-6), 2013-03-22
Supplement: MOESM1 [file 13428_2013_321_MOESM1_ESM.pdf]

```

% Copyright 2012 Franziska Geringswald and Florian J. Baumgartner
% This program is free software: you can redistribute it and/or modify
% it under the terms of the GNU General Public License as published by
% the Free Software Foundation, either version 3 of the License, or
% (at your option) any later version.
%
% This program is distributed in the hope that it will be useful,
% but WITHOUT ANY WARRANTY; without even the implied warranty of
% MERCHANTABILITY or FITNESS FOR A PARTICULAR PURPOSE. See the
% GNU General Public License for more details.
%
% This program can be used to validate a simulated central scotoma using a
% visual high-acuity, i.e. Landolt ring discrimination, task.
% If you use this program, please cite
% Geringswald, F., Baumgartner, F.J., & Pollmann, S. (2013).
% "A behavioral task for the validation of a
% gaze-contingent simulated scotoma", Behavior Research Methods.
% doi:10.3758/s13428-013-0321-6
%
% You should have received a copy of the GNU General Public License
% along with this program. If not, see <http://www.gnu.org/licenses/>.

function runValidation
% Screen parameters have to be adapted to match the local setup. Setting
% the variable "tracking" to zero will run mouse simulation mode, otherwise
% the code is written to run with iViewX eye trackers based on the
% iViewXToolbox extension.
%
% The code was tested on Matlab version R2008b under Microsoft Windows XP SP3
% using an iViewX Hi-Speed eye tracking
% system (SensoMotoric Instruments GmbH, Teltow, Germany) with a temporal
% resolution of 240 Hz.

clear all
close all

try
    % for debugging only
    Screen('Preference', 'SkipSyncTests', 1);
    % Reset the random-number generator for each experiment
    rand('state',sum(100*clock));
    % unify key names independently of operating system
    KbName('UnifyKeyNames')
    % Make sure we run on OpenGL Psychtoolbox
    AssertOpenGL;

    % tracking of gaze data; 0 = dummy mode, simulate gaze via mouse; 1 =
    % track gaze via eye tracker
    tracking = 1;

    % -----
    % screen parameters
    % -----
    scr=Screen('Screens');
    whichScreen=max(scr);
    param.screen.vDist = 60; % viewing distance
    param.screen.res = get(0, 'ScreenSize'); % screen resolution in pixels
    param.screen.size = [40 30]; % screen size in cm

```

```

% -----
% design
% -----
param.design.nblocks = 6; % number of experimental blocks
param.design.nstim = 8; % number of stimulus positions on imaginary circle
param.design.circ_size = 9; % size of imaginary circle in degree of visual
angle
param.design.ngap = 4; % number of gap positions
param.design.nrep = 2; % repetitions of each position x gap combination
per block

% presentation times
param.design.time.fix = 1; % fixation interval in sec
param.design.time.iti = .5; % inter trial interval in sec
param.design.time.search = 5; % maximal duration of search display
presentation in sec
param.design.time.vali = 2; % duration of each validation dot in sec

% gap size of Landolt ring in pixels
param.design.c_gap = 2;

% instructions
insEtSetup = 'The eye tracker will now be set up. Please await further
instructions.';
insSearch = ['Find the "C" and indicate the direction of its opening with
the response keys.\n\n', 'Start by pressing any button'];
insCaliTest = ['Fixate the dots one after another', '\n\n', 'Start by pressing
any button'];
insFin = 'Thank you for your participation';
% response buttons (<, ^, >, v + q to exit)
keycode = [KbName('LeftArrow') KbName('UpArrow') KbName('RightArrow')
KbName('DownArrow') KbName('q')]; % response key assignments

% -----
% set up folders for logging and prompt basic experimental parameters
% -----
p = what;
resultsDir = [p.path '\results'];
if ~isdir(resultsDir)
    mkdir(resultsDir)
end

% directory for storing gaze data, on remote machine controlling the
% eye tracker, absolute path necessary
eyeDir = 'D:\data\scoVal\';

% prompt subject ID and create results folder
param.subj.id = input('Please enter subject ID:', 's');
param.subj.subjDir = [resultsDir '\ ' param.subj.id];
if isdir(param.subj.subjDir)
    uID = datestr(now);
    uID = strrep(uID, ' ', '_');
    uID = strrep(uID, ':', '-');
    param.subj.subjDir = [resultsDir '\ ' param.subj.id '_' uID];
end
mkdir(param.subj.subjDir)
disp(['Created subject directory ' param.subj.subjDir])

```

```

% alternate scotoma presence across blocks; 1 = start with scotoma
% in first block; 0 = start with scotoma in second block
param.subj.ranscot = input('Scotoma block 1? 1 = yes 0 = no :', 's');
tmpscot = param.subj.ranscot;
% -----
% stimulus creation
% -----

% calculate pixel sizes
param.screen.px.cm = param.screen.size./param.screen.res(3:4); % pixel
size in cm
param.screen.px.dg = (2*atan(param.screen.px.cm./
(2*param.screen.vDist))).*(180/pi); % pixel size in degree
param.screen.px.arcmin = param.screen.px.dg*60; % pixel size in arcmin
param.screen.px.perdg = round(1./param.screen.px.dg(1));

% define colors
param.screen.cols.black = BlackIndex(whichScreen);
param.screen.cols.white = WhiteIndex(whichScreen);
param.screen.cols.gray = round((param.screen.cols.white-
param.screen.cols.black)/2);

% relation between visual acuity and eccentricity
% Marmor, D.J., & Marmor, M.F. (2010). Simulating vision with and
% without macular disease. Archives of Ophthalmology, 128,117-125.
relvis(1,:) = [1 0.66666667 0.5 0.4 0.33333333 0.28571429 0.25 0.1 0.05 0.04
0.03333333]; % visual acuity
relvis(2,:) = [0 .5 1 2 3 4 5 10 20 30 40]; % distance from fovea

c_dia = param.design.c_gap*5; % diameter of landolt c

findvis = 1/(param.design.c_gap*param.screen.px.arcmin(1)); % visual acuity
acquired to see gap
findfov = interp1(relvis(1,:),relvis(2,:),findvis); % where on fovea can I
still see the gap?

param.design.scotomaRad = findfov; % radius of absolute scotoma in degree
param.design.scotomaCorr = .5; % gauss fading in degree
param.design.scotomaSize =
round((param.design.scotomaRad+param.design.scotomaCorr)*param.screen.px.perdg*2);
% diameter of scotoma texture in pixel

% create stimulus texture matrices
[ring, sco, fix] = makeStims(param.screen.cols, param.screen.px.perdg,
param.design.scotomaSize);

% stimulus coordinates
[X,Y] = makeCircCoord(param.design.nstims, param.design.circ_size,
param.screen.px.perdg,[0 0 param.screen.res(3) param.screen.res(4)]);
param.design.X=round(X);param.design.Y=round(Y);

% randomize sequence
param.design.sequence =
randomizer(param.design.nstims,param.design.ngap,param.design.nblocks,param.design
.nrep);
% rotation angles of Landolt gap
param.design.rot = [270 0 90 180];

```

```

results.resp = zeros(1, size(param.design.sequence, 2), param.design.nblocks);
results.rt = results.resp;
results.perf = results.resp;

% feedback
param.design.tone = [2000,500,22050,0.5]; % high pitch frequency, low pitch
frequency, sampling frequency, duration

% open Window, AA set to 2 samples
[w, rect] = Screen('OpenWindow', whichScreen, param.screen.cols.gray, [], [], 2,
[], 2);
HideCursor;
Screen('BlendFunction', w, 'GL_SRC_ALPHA', 'GL_ONE_MINUS_SRC_ALPHA');

% Do dummy calls to GetSecs, WaitSecs, KbCheck
KbCheck;
WaitSecs(0.1);
GetSecs;

% create stimulus textures
% distractor and target
t_ring(1) = Screen('MakeTexture', w, ring(:, :, 1));
t_ring(2) = Screen('MakeTexture', w, ring(:, :, 2));
% fixation
t_fix = Screen('MakeTexture', w, fix);
% scotoma
t_scot = Screen('MakeTexture', w, sco);

% points for eye tracker validation
param.design.valipoints = calipoints(rect(3), rect(4), 800, 600);

% eyetracker
if tracking
    % present ET instruction
    ovals = abs(rect-50);
    oval_coord = [ovals(1), ovals(1); ovals(1), ovals(4); ovals(3), ovals(1);
ovals(3), ovals(4)];
    DrawFormattedText(w, insEtSetup, 'center', 'center',
param.screen.cols.white);
    Screen('FillOval', w, 255, recter(30, [oval_coord(:, 1) oval_coord(:, 2)],
rect));
    Screen('FillOval', w, 0, recter(4, oval_coord, rect));
    Screen('Flip', w);
    KbStrokeWait;
    % initialize eye tracker
    ivx = IViewXinitDefaults(w);
    iViewX('setchecklevel', ivx, 3);
    ivx.absCalPos = param.design.valipoints;
    [success, ivx]=iViewX('openconnection', ivx);
    [success, ivx]=iViewX('datastreamingon', ivx);
    [success, ivx]=iViewX('clearbuffer', ivx);
    pnet(ivx.udp, 'setreadtimeout', 10^-6);
    [result, ivx] = iViewXCalibrate(ivx, 1);
end

% present search instruction
DrawFormattedText(w, insSearch, 'center', 'center', param.screen.cols.white);

```

```

Screen('Flip', w);
KbStrokeWait;

% create logfiles
% search experiment
resFileName = [param.subj.subjDir '\\' param.subj.id];
fid = fopen(resFileName, 'a');
fprintf(fid, '%s\n', [param.subj.id]);
fprintf(fid, '%s\n', [datestr(now)]);
fprintf(fid, '%s\n', ['blk trl cond targ_pos gap resp rt targ_X targ_Y']);

% save information about validation points
valiFileName = [param.subj.subjDir '\\' param.subj.id '_valInfo'];
vid = fopen(valiFileName, 'a');
fprintf(vid, '%s\n', [param.subj.id]);
fprintf(vid, '%s\n', [datestr(now)]);
fprintf(vid, '%s\n', ['blk trl X Y']);

% save .mat file containing experiment parameters
save([resFileName '_setup'], 'param');

for k=1:param.design.nblocks

    if rem(tmpscot,2)
        scotoma = 1;
    else
        scotoma = 0;
    end

    % present number of current block
    dg = ['Block ', num2str(k), ' of ', num2str(param.design.nblocks)];
    DrawFormattedText(w, dg, 'center', 'center', param.screen.cols.white)
    Screen('Flip', w);
    KbStrokeWait;

    % Clear screen to background color
    Screen('Flip', w);

    % Wait a second before starting trial
    WaitSecs(1.000);

    if tracking
        iViewX('startrecording', ivx);
    end

    % trial loop
    for i=1:size(param.design.sequence,2)
        cor = [0, 0];
        % fixation
        FIX = GetSecs;
        if tracking
            iViewX('message', ivx, ['fixation_on' ])
        end
        while GetSecs-FIX <= param.design.time.fix;
            Screen('DrawTexture', w, t_fix, [],
recter(param.screen.px.perdg*9, [rect(3)/2, rect(4)/2]),[],1);
            if scotoma
                if tracking

```

```

        % latest gaze sample available
        data = iViewX('receivelast',ivx);
        if data ~= -1 & strcmp(data(4:6),'SPL')
            J = strread(data,'%s');
            cor = [str2double(J{3}),str2double(J{4})];
        end
    else
        [mouse_x, mouse_y] = GetMouse;
        cor = [mouse_x, mouse_y];
    end
    Screen('DrawTexture',w,t_scot,
[],recter(param.design.scotomaSize, [cor(1),cor(2)],rect));
end

    Screen('Flip', w);
end

keyisdown = 0;
keyFlag    = 0;
secs = 0;

% while loop to show stimulus until subjects response or until
% "duration" seconds elapsed.
initTime = GetSecs;

% distractor positions
distr = setdiff([1:8],param.design.sequence(1,i,k));
if tracking
    iViewX('message',ivx,['display_on' ])
end

while 1
    Screen('DrawTextures',w,t_ring(1),[],recter(c_dia,
[param.design.X(distr),param.design.Y(distr)],rect),[],1);
    Screen('DrawTexture', w, t_ring(2), [], recter(c_dia,
[param.design.X(param.design.sequence(1,i,k)),param.design.Y(param.design.sequence
(1,i,k))]),[param.design.rot(param.design.sequence(2,i,k))],1);
    if scotoma
        if tracking
            % latest gaze sample available
            data = iViewX('receivelast',ivx);
            if data ~= -1 & strcmp(data(4:6),'SPL')
                J = strread(data,'%s');
                cor = [str2double(J{3}),str2double(J{4})];
            end
        else
            [mouse_x, mouse_y] = GetMouse;
            cor = [mouse_x, mouse_y];
        end
        Screen('DrawTexture',w,t_scot,
[],recter(param.design.scotomaSize, [cor(1),cor(2)],rect));
    end

    Screen('Flip', w);

    [keyisdown, secs, key]=KbCheck;
    if ismember(find(key(1:end)), keycode)

```

```

key=KbName(key);
if strcmp(key, 'q')
    fclose('all');
    Screen('CloseAll');
    if tracking
        iViewX('stoprecording', ivx);
        [success, ivx]=iViewX('datastreamingoff', ivx);
        [success, ivx]=iViewX('closeconnection', ivx);
    end
    return
end
% -----
results.rt(i,k) = (secs-initTime)*1000;
if strcmp(key, 'LeftArrow') results.resp(i,k) = 1;
elseif strcmp(key, 'UpArrow') results.resp(i,k) = 2;
elseif strcmp(key, 'RightArrow') results.resp(i,k) = 3;
elseif strcmp(key, 'DownArrow') results.resp(i,k) = 4;
end;
fprintf(fid, '%d %d %d %d %d %d %d %d %d %d\n', [k i scotoma
param.design.sequence(1,i,k) param.design.sequence(2,i,k) results.resp(i,k)
round(results.rt(i,k)) param.design.X(param.design.sequence(1,i,k))
param.design.Y(param.design.sequence(1,i,k))]);
if results.resp(i,k)==param.design.sequence(2,i,k)
    results.perf(i,k) = 1; tone =
makebeep(param.design.tone(1),param.design.tone(4));
else
    results.perf(i,k) = 0; tone =
makebeep(param.design.tone(2),param.design.tone(4),param.design.tone(3));
end
keyFlag = 1;
if tracking
    iViewX('message',ivx,['response' ])
end
end
if GetSecs-initTime > param.design.time.search | keyFlag == 1
    break
end
end

if keyFlag==0
    results.resp(i,k) = 100; results.rt(i,k)=-1;
    tone =
makebeep(param.design.tone(2),param.design.tone(4),param.design.tone(3));
    fprintf(fid, '%d %d %d %d %d %d %d %d %d %d\n', [k i scotoma
param.design.sequence(1,i,k) param.design.sequence(2,i,k) results.resp(i,k)
round(results.rt(i,k)) param.design.X(param.design.sequence(1,i,k))
param.design.Y(param.design.sequence(1,i,k))]);
    if tracking
        iViewX('message',ivx,['response' ])
    end
end

% play feedback sound
sound(tone,param.design.tone(3));

%ITI
ITI = GetSecs;

```

```

while GetSecs-ITI <= param.design.time.iti;
    Screen('Flip', w);
end

if tracking
    sets = i;
    iViewX('incrementsetnumber', ivx, num2str(sets));
end
end

if tracking
    iViewX('stoprecording', ivx);
    iViewX('datafile', ivx, [eyeDir, param.subj.id, '_lan_', num2str(k)]);
end

% ET validation after each block
DrawFormattedText(w, insCaliTest, 'center', 'center',
param.screen.cols.white);
Screen('Flip', w);
KbStrokeWait;
if tracking
    iViewX('startrecording', ivx);
end
for i = 1:length(param.design.valipoints)
    valiset=i;
    VALI = GetSecs;
    while GetSecs-VALI <= param.design.time.vali
        Screen('FillOval',w,[0,0,0], recter(10,
[param.design.valipoints(i,1) param.design.valipoints(i,2)], rect));
        if ~tracking
            [mouse_x, mouse_y] = GetMouse;
            Screen('FillOval',w,[255,0,0], recter(10, [mouse_x mouse_y],
rect));
        end
        Screen('Flip',w);

        [a,b,c]=KbCheck;
        if a
            if strcmp(KbName(c), 'ESCAPE')
                break
            end
        end
    end
    fprintf(vid, '%d %d %d %d\n', [k i param.design.valipoints(i,1)
param.design.valipoints(i,2)]);
    if tracking
        iViewX('incrementsetnumber', ivx, num2str(valiset));
    end
end
if tracking
    iViewX('stoprecording', ivx);
    iViewX('datafile', ivx, [eyeDir, param.subj.id, '_val_',
num2str(k)]);
end
tmpscot=tmpscot+1;
end

```



```

% Done. Show cursor and close window.
DrawFormattedText(w, insFin, 'center', 'center', param.screen.cols.white);
Screen('Flip', w);
fclose('all');

% save .mat file containing experiment results
save([resFileName '_results'], 'results');

if tracking
    [success, ivx]=iViewX('datastreamingoff', ivx);
    [success, ivx]=iViewX('closeconnection', ivx);
end

KbWait;
ShowCursor;
Screen('CloseAll');

catch
    ShowCursor;
    fclose('all');
    if tracking
        iViewX('stoprecording', ivx);
        [success, ivx]=iViewX('datastreamingoff', ivx);
        [success, ivx]=iViewX('closeconnection', ivx);
    end
    Screen('CloseAll');
    psychrethrow(psychlasterror);
end
end

function M = gauss(x,s,r)
% M = gauss(x,s,r)
% Creating 2-dim standardized Gaussian distribution
% x: int length of the window
% s: float standard deviation
% r: int cut-off value for creating a plateau
    if nargin == 2
        r = 0;
    elseif nargin == 1
        r = 0;
        s = 1;
    elseif nargin == 0
        r = 0;
        s = 1;
        x = 100;
    end
    G = repmat(exp(-(linspace(-3,3,x)).^2./(2*s^2)),x,1);
    M = G.*G';
    M = M-min(min(M));
    M = M/max(max(M));

    k = max(M(x/2+r/2,:));
    M = M/k;
    M(M>1) = 1;
    M = M *255;
end

function rect = recter(siz, coord, Rect, shift)

```

```

% rect = recter(siz, coord, Rect, shift)
% Computes PTB coordinate points of a rectangle
% siz : [int,int] size of the rectangle (if len(siz)==1 square)
% coord: [float,float] center coordinates of the rectangle (if coord<1 relative
to Rect)
% Rect: [int,int,int,int] reference frame if coord<1
% shift: [int,int] shift of the center of the rectangle
    if nargin == 3
        shift = [0,0];
    elseif nargin == 2
        Rect = get(0, 'ScreenSize');
        shift = [0,0];
    elseif nargin == 1
        coord = [0.5,0.5];
        Rect = get(0, 'ScreenSize');
        shift = [0,0];
    end

    if size(siz,2) == 1
        siz = [siz,siz];
    end

    if coord(1)>=1
        rectx1 = -siz(:,1)/2+shift(:,1)+coord(:,1)+1;
        recty1 = -siz(:,2)/2+shift(:,2)+coord(:,2)+1;
        rectx2 = siz(:,1)/2+shift(:,1)+coord(:,1);
        recty2 = siz(:,2)/2+shift(:,2)+coord(:,2);
    else
        rectx1 = -siz(:,1)/2+shift(:,1)+Rect(3)*coord(:,1)+1;
        recty1 = -siz(:,2)/2+shift(:,2)+Rect(4)*coord(:,2)+1;
        rectx2 = siz(:,1)/2+shift(:,1)+Rect(3)*coord(:,1);
        recty2 = siz(:,2)/2+shift(:,2)+Rect(4)*coord(:,2);
    end
    rect = [rectx1,recty1,rectx2,recty2];

    if size(rect,1) > 1
        rect = rect';
    end
end

function [out] = makeCirc(stimSize)
% [out] = makeCirc(stimSize)
% creates a circular disk of size 'stimSize' which is used for stimulus
% generation
    [x,y] = meshgrid(linspace(-stimSize, stimSize, 2*stimSize), linspace(-
stimSize, stimSize, 2*stimSize));
    d = sqrt(x.^2+y.^2);
    out = d<=stimSize;
end

function [ring, sco, fix] = makeStims(cols, pixel, scotomaSize)
% [ring, sco, fix] = makeStims(cols, pixel, scotomaSize)
% creates stimulus texture matrices for Landolt ring and closed circles
% (upscaled to s), the simulated scotoma patch of the size 'scotomaSize' in
% degree and a fixation stimulus.
    s = 100;
    out_tmp = makeCirc(s/2*5);
    in_tmp = makeCirc(s/2*3);

```

```

dist = zeros(size(out_tmp));
in = zeros(size(in_tmp));

% distractor
dist(out_tmp==0)= cols.gray;
dist(out_tmp==1)= cols.black;
in(in_tmp==0) = cols.black;
in(in_tmp==1) = cols.gray;
dist(s+1:s*4, s+1:s*4)=in;
%target
tar = dist;
st = s*5/2-s/2+1;
ed = s*5/2+s/2;
tar(1:s*5/2,st:ed)=cols.gray; % gap

ring(:,:,1)=dist;
ring(:,:,2)=tar;

% scotoma
sco = ones(scotomaSize,scotomaSize,4)*cols.gray;
if rem((scotomaSize*2-pixel),2)
    sco(:,:,4) = gauss(scotomaSize,1,scotomaSize-(pixel+1));
else
    sco(:,:,4) = gauss(scotomaSize,1,scotomaSize-pixel);
end

% fixation
rad = round(10*pixel);
radIn = round(.3*rad);
radii = linspace(radIn, rad, 3);
lwd = 5;

[x,y] = meshgrid(linspace(-rad,rad, 2*rad), linspace(-rad,rad,2*rad));
d = sqrt(x.^2+y.^2);

for i = 1:3
    ann(:,:,i) = (abs(d<=radii(i))&~abs(d<=radii(i)-lwd));
end;

fix = sum(ann, 3);
fix(fix==1)=cols.white;
fix(fix==0)=cols.gray;
cr = eye(size(fix,1));
fix(cr==1)=cols.white;
fix(flipud(cr)==1)=cols.white;
end

function [X,Y] = makeCircCoord(nstims, circ_size, pixel,rect)
% [X,Y] = coords(nstims, circ_size, pixel, rect)
%
% Returns X and Y coordinates of n items ('nstims') on n concentric circles
(length of 'circ_size') with radii
% of n times one degree of visual angle ('pixel') in a given area ('rect')
%
% n_stims = number of stimuli, vector if more than one circle
% circ_size(1:2) = size of inner and outer circle in degree
% pixel = number of pixel per degree

```

```

% rect = size of window
%
% nstim = [8 16];
% circ_size = [5 8];
% pixel = pixel;
% rect=rect;

if isempty(rect)
    a = get(0, 'ScreenSize');
    rect = [0 0 a(3) a(4)];
end

n_circ=max(size(nstim));

if max(circ_size)*pixel >= rect(4)/2
    disp('cut circle?');
    cut = input('l=cut, 0=shrink: ');

    if cut == 1
        radius(1:n_circ) = linspace(min(circ_size)*pixel,
max(circ_size)*pixel, n_circ);
    else
        siz = input('stimsize [px]: ');
        if n_circ == 1
            radius = rect(4)/2-siz;
        else
            radius(1:n_circ) = linspace(min(circ_size)*pixel, rect(4)/2-siz,
n_circ);
        end
    end
else
    radius(1:n_circ) = linspace(min(circ_size)*pixel, max(circ_size)*pixel,
n_circ);
end

% stimulus coordinates on circle
if max(size(nstim))==1
    theta = linspace(2*pi/nstim, 2*pi,nstim);
    [X,Y] = pol2cart(repmat(theta',1,n_circ), repmat(radius,nstim,1));
    % translate to screen coords
    %
    %      2
    %      3      1
    %      4      8
    %      5      7
    %      6
    X = X+rect(3)/2;
    Y = (Y-rect(4)/2)*-1;
else
    for i=1:n_circ
        theta{i} = linspace(2*pi/nstim(i), 2*pi, nstim(i));
        [X{i},Y{i}] = pol2cart(theta{i}, radius(i));
        X{i} = X{i}+rect(3)/2;
        Y{i} = (Y{i}-rect(4)/2)*-1;
    end
end
end

function [sequence] = randomizer(nstim,ngap,nblocks, nrep)

```

```

% [sequence] = randomizer(nstims,ngap,nblocks, nrep)
% Returns a three dimensional matrix containing target stimulus parameters. Each
% column contains pairs of target position ('nstims', first row) and gap
orientation
% ('ngap', second row), the unique combinations being repeated 'nrep' times and
% shuffled for each experimental block ('nblocks', third dimension).
cond = [repmat(sort(repmat(1:nstims,1,ngap)),1,nrep);
repmat(repmat(1:ngap,1,nstims),1,nrep)];
sequence = zeros(size(cond,1), size(cond,2),nblocks);

for i=1:nblocks
    ran = randperm(size(cond,2));
    sequence(:,:,i) = cond(:,ran);
end
end

function C = calipoints(resx,resy,picx,picy)
% C = calipoints(resx,resy,picx,picy)
% List of 13 equally distributed fixation point
% resx,resy : int, int x and y dimension of the reference frame
% picx,picy : int, int max. x and y dispersion from the center of the
% reference frame
X = resx/2;
Y = resy/2;

x = picx/2;
y = picy/2;

C = [
X, Y;...
X-x, Y-y;...
X+x, Y-y;...
X-x, Y+y;...
X+x, Y+y;...
X-x, Y;...
X, Y-y;...
X+x, Y;...
X, Y+y;...
X-x/2, Y-y/2;...
X+x/2, Y-y/2;...
X-x/2, Y+y/2;...
X+x/2, Y+y/2];
end

```
